# Supplementary material for: Gas Permeability and Mechanical Properties of Polyurethane-Based Membranes for Blood Oxygenators
Source: MDPI journal article supplement (doi:10.3390/membranes12090826), 2022-08-24
Supplement: s1 [file s1]

Supplementary Materials:

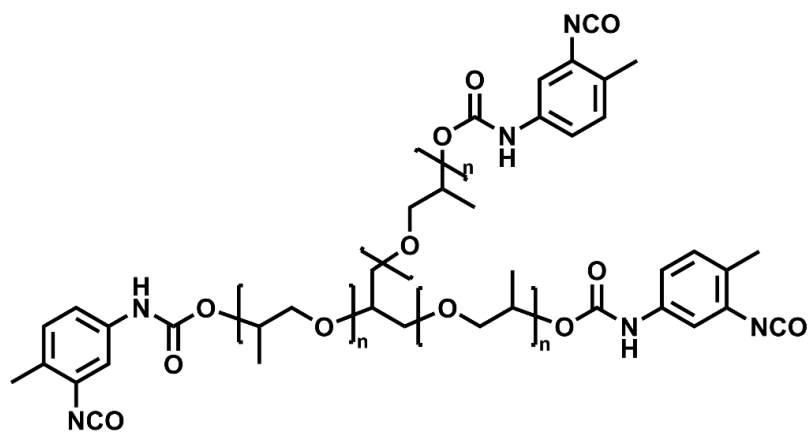

**Figure S1.** Chemical structure of PUR, a PPO-based polyurethane prepolymer ( $n=20$ ).

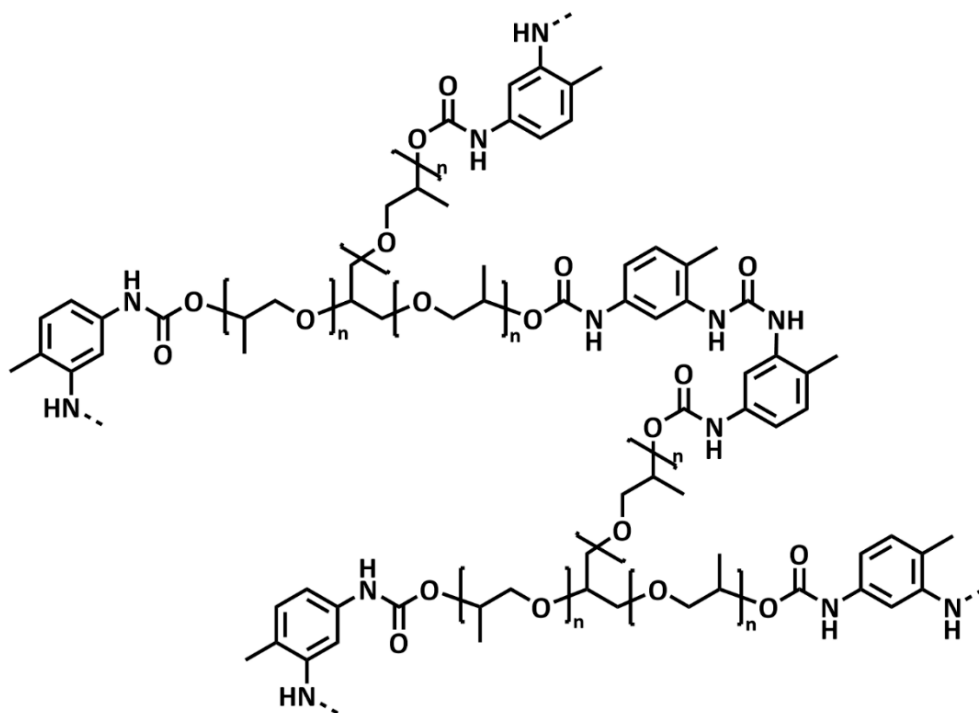

**Figure S2.** Probable chemical structure of the PU membranes ( $n=20$ ).

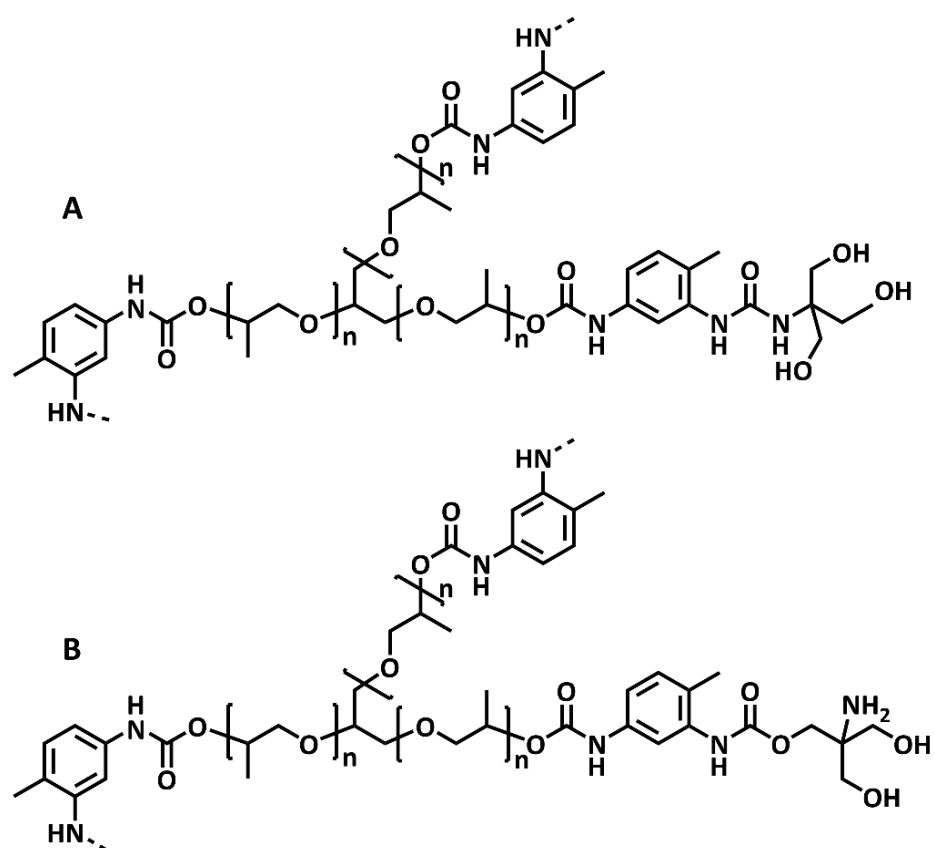

**Figure S3.** Possible chemical structures for the PU/TRIS membrane: reaction with the amine group (A) and reaction with an alcohol group (B).

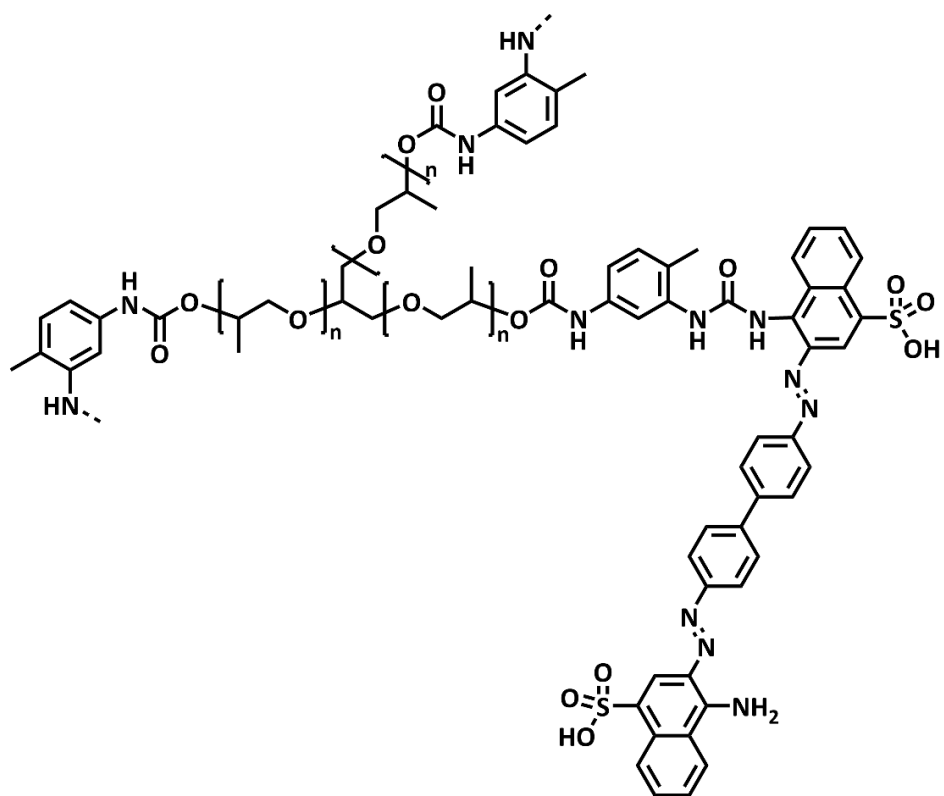

**Figure S4.** Chemical structure of the PU/CR membrane.

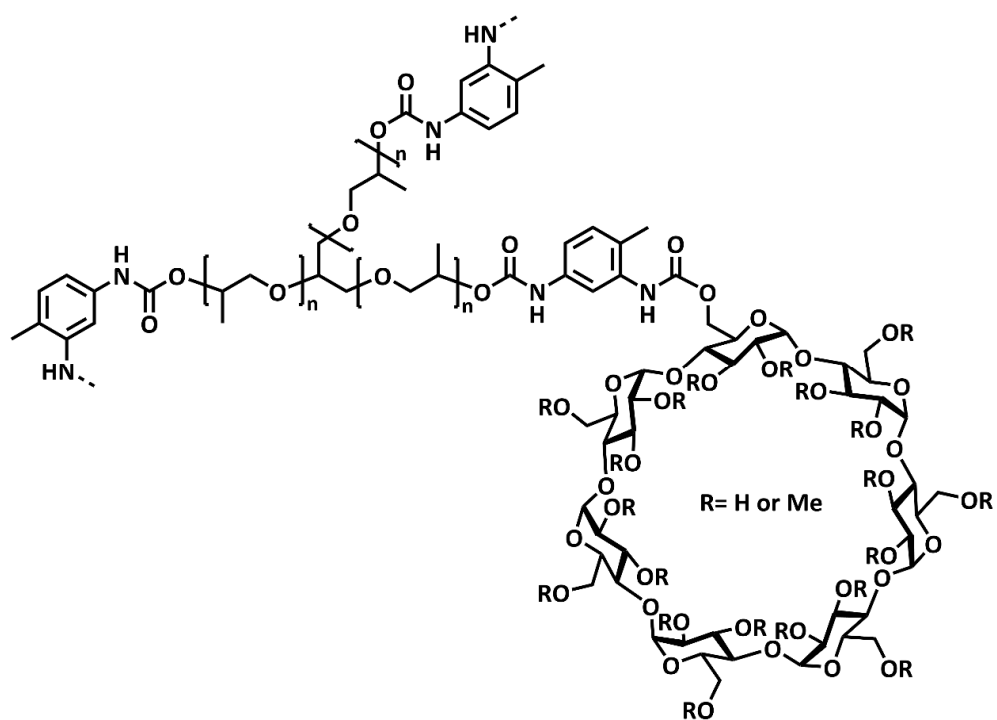

**Figure S5.** Chemical structure of the PU/MBCD membrane.

Table S1. Casting solution compositions of the PU/TRIS, PU/CR and PU/MBCD membranes.

|                | <b>PUR (g)</b> | <b>TRIS (g)</b> | <b>CR (g)</b> | <b>MBCD (g)</b> | <b>DMF (mL)</b> |
|----------------|----------------|-----------------|---------------|-----------------|-----------------|
| <b>PU/TRIS</b> | 9.92           | 0.08            | -             | -               | 4.54            |
| <b>PU/CR</b>   | 9.96           | -               | 0.04          | -               | 4.54            |
| <b>PU/MBCD</b> | 9.96           | -               | -             | 0.04            | 4.54            |
